# Supplementary material
Source: PubMed Central journal article supplement (PMC6020674)
Supplement: NIHMS971778-supplement-Supplement1.pdf [file NIHMS971778-supplement-Supplement1.pdf]

CC-40

| Date       | Scenario | Equation                 | TSS Load (kg/day)<br>observed | TDS Load (kg/day)<br>observed | TDS (kg/day)<br>estimated | Percent<br>Difference | Ratio<br>(estimated/observed) |
|------------|----------|--------------------------|-------------------------------|-------------------------------|---------------------------|-----------------------|-------------------------------|
| 2/3/2003   | S1-1     | TDS = 1.4211*TSS + 28688 | 190.83                        | 16024.85                      | 28959.19218               | 80.71                 | 1.81                          |
| 4/1/2003   |          |                          | 1100.96                       | 36554.23                      | 30252.57025               | -17.24                | 0.83                          |
| 5/15/2003  |          |                          | 23599.63                      | 84130.45                      | 62225.4326                | -26.04                | 0.74                          |
| 7/14/2003  |          |                          | 2055.12                       | 68158.06                      | 31608.53114               | -53.62                | 0.46                          |
| 8/12/2003  |          |                          | 3386.05                       | 40268.66                      | 33499.92274               | -16.81                | 0.83                          |
| 10/8/2003  |          |                          | 880.77                        | 36390.30                      | 29939.6562                | -17.73                | 0.82                          |
| 2/2/2004   |          |                          | 978.63                        | 22162.02                      | 30078.72911               | 35.72                 | 1.36                          |
| 4/6/2004   |          |                          | 1330.93                       | 36226.38                      | 30579.3916                | -15.59                | 0.84                          |
| 5/19/2004  |          |                          | 4932.29                       | 53241.31                      | 35697.27474               | -32.95                | 0.67                          |
| 6/8/2004   |          |                          | 14385.84                      | 64715.73                      | 49131.71799               | -24.08                | 0.76                          |
| 7/12/2004  |          |                          | 1120.53                       | 47672.94                      | 30280.38484               | -36.48                | 0.64                          |
| 8/10/2004  |          |                          | 1477.73                       | 35642.83                      | 30788.00096               | -13.62                | 0.86                          |
| 10/6/2004  |          |                          | 38973.88                      | 44037.19                      | 84073.787                 | 90.92                 | 1.91                          |
| 12/1/2004  |          |                          | 308.27                        | 10946.60                      | 29126.07967               | 166.07                | 2.66                          |
| 2/6/1995   |          |                          | 440.38                        | 16916.57                      | 29313.8281                | 73.28                 | 1.73                          |
| 4/4/1995   |          |                          | 315.61                        | 18537.75                      | 29136.51014               | 57.17                 | 1.57                          |
| 8/15/1995  |          |                          | 3001.94                       | 76831.74                      | 32954.06156               | -57.11                | 0.43                          |
| 10/11/1995 |          |                          | 1193.93                       | 39496.59                      | 30384.68952               | -23.07                | 0.77                          |
| 12/7/1995  |          |                          | 954.16                        | 27595.98                      | 30043.96089               | 8.87                  | 1.09                          |
| 2/5/1996   |          |                          | 1034.90                       | 24807.70                      | 30158.69604               | 21.57                 | 1.22                          |
| 4/2/1996   |          |                          | 1291.79                       | 32131.66                      | 30523.76243               | -5.00                 | 0.95                          |
| 5/23/1996  |          |                          | 23844.29                      | 136519.38                     | 62573.11488               | -54.17                | 0.46                          |
| 7/15/1996  |          |                          | 1978.05                       | 82521.74                      | 31499.01122               | -61.83                | 0.38                          |
| 8/20/1996  |          |                          | 6269.34                       | 50338.28                      | 37597.35839               | -25.31                | 0.75                          |
| 10/9/1996  |          |                          | 822.05                        | 25886.29                      | 29856.21246               | 15.34                 | 1.15                          |
| 12/5/1996  |          |                          | 129.67                        | 25715.82                      | 28872.27161               | 12.27                 | 1.12                          |
| 2/24/1997  |          |                          | 176.15                        | 20181.87                      | 28938.33124               | 43.39                 | 1.43                          |
| 4/1/1997   |          |                          | 880.77                        | 30095.77                      | 29939.6562                | -0.52                 | 0.99                          |
| 7/14/1997  |          |                          | 6507.88                       | 107916.92                     | 37936.34861               | -64.85                | 0.35                          |
| 8/12/1997  |          |                          | 3875.37                       | 74000.18                      | 34195.28729               | -53.79                | 0.46                          |
| 10/8/1997  |          |                          | 1443.48                       | 36364.08                      | 30739.32544               | -15.47                | 0.85                          |
| 12/4/1997  |          |                          | 792.69                        | 24696.23                      | 29814.49058               | 20.72                 | 1.21                          |

CC-40 (continued)

| Date       | Scenario | Equation                 | TSS Load (kg/day)<br>observed | TDS Load (kg/day)<br>observed | TDS (kg/day)<br>estimated | Percent<br>Difference | Ratio<br>(estimated/observed) |
|------------|----------|--------------------------|-------------------------------|-------------------------------|---------------------------|-----------------------|-------------------------------|
| 2/3/2003   | S2-1     | TDS = 1.1889*TSS + 42716 | 190.83                        | 16024.85                      | 42942.88085               | 167.98                | 2.68                          |
| 4/1/2003   |          |                          | 1100.96                       | 36554.23                      | 44024.928                 | 20.44                 | 1.20                          |
| 5/15/2003  |          |                          | 23599.63                      | 84130.45                      | 70773.59878               | -15.88                | 0.84                          |
| 7/14/2003  |          |                          | 2055.12                       | 68158.06                      | 45159.33226               | -33.74                | 0.66                          |
| 8/12/2003  |          |                          | 3386.05                       | 40268.66                      | 46741.68077               | 16.07                 | 1.16                          |
| 10/8/2003  |          |                          | 880.77                        | 36390.30                      | 43763.1424                | 20.26                 | 1.20                          |
| 2/2/2004   |          |                          | 978.63                        | 22162.02                      | 43879.49155               | 97.99                 | 1.98                          |
| 4/6/2004   |          |                          | 1330.93                       | 36226.38                      | 44298.34851               | 22.28                 | 1.22                          |
| 5/19/2004  |          |                          | 4932.29                       | 53241.31                      | 48579.99742               | -8.76                 | 0.91                          |
| 6/8/2004   |          |                          | 14385.84                      | 64715.73                      | 59819.32582               | -7.57                 | 0.92                          |
| 7/12/2004  |          |                          | 1120.53                       | 47672.94                      | 44048.19783               | -7.60                 | 0.92                          |
| 8/10/2004  |          |                          | 1477.73                       | 35642.83                      | 44472.87224               | 24.77                 | 1.25                          |
| 10/6/2004  |          |                          | 38973.88                      | 44037.19                      | 89052.05106               | 102.22                | 2.02                          |
| 12/1/2004  |          |                          | 308.27                        | 10946.60                      | 43082.49984               | 293.57                | 3.94                          |
| 2/6/1995   |          |                          | 440.38                        | 16916.57                      | 43239.5712                | 155.60                | 2.56                          |
| 4/4/1995   |          |                          | 315.61                        | 18537.75                      | 43091.22603               | 132.45                | 2.32                          |
| 8/15/1995  |          |                          | 3001.94                       | 76831.74                      | 46285.01034               | -39.76                | 0.60                          |
| 10/11/1995 |          |                          | 1193.93                       | 39496.59                      | 44135.45969               | 11.74                 | 1.12                          |
| 12/7/1995  |          |                          | 954.16                        | 27595.98                      | 43850.40426               | 58.90                 | 1.59                          |
| 2/5/1996   |          |                          | 1034.90                       | 24807.70                      | 43946.39232               | 77.15                 | 1.77                          |
| 4/2/1996   |          |                          | 1291.79                       | 32131.66                      | 44251.80885               | 37.72                 | 1.38                          |
| 5/23/1996  |          |                          | 23844.29                      | 136519.38                     | 71064.47167               | -47.95                | 0.52                          |
| 7/15/1996  |          |                          | 1978.05                       | 82521.74                      | 45067.7073                | -45.39                | 0.55                          |
| 8/20/1996  |          |                          | 6269.34                       | 50338.28                      | 50169.61776               | -0.34                 | 1.00                          |
| 10/9/1996  |          |                          | 822.05                        | 25886.29                      | 43693.3329                | 68.79                 | 1.69                          |
| 12/5/1996  |          |                          | 129.67                        | 25715.82                      | 42870.16263               | 66.71                 | 1.67                          |
| 2/24/1997  |          |                          | 176.15                        | 20181.87                      | 42925.42848               | 112.69                | 2.13                          |
| 4/1/1997   |          |                          | 880.77                        | 30095.77                      | 43763.1424                | 45.41                 | 1.45                          |
| 7/14/1997  |          |                          | 6507.88                       | 107916.92                     | 50453.21882               | -53.25                | 0.47                          |
| 8/12/1997  |          |                          | 3875.37                       | 74000.18                      | 47323.42655               | -36.05                | 0.64                          |
| 10/8/1997  |          |                          | 1443.48                       | 36364.08                      | 44432.15004               | 22.19                 | 1.22                          |
| 12/4/1997  |          |                          | 792.69                        | 24696.23                      | 43658.42816               | 76.78                 | 1.77                          |

CC-40 (continued)

| Date       | Scenario | Equation                 | TSS Load (kg/day)<br>observed | TDS Load (kg/day)<br>observed | TDS (kg/day)<br>estimated | Percent<br>Difference | Ratio<br>(estimated/observed) |
|------------|----------|--------------------------|-------------------------------|-------------------------------|---------------------------|-----------------------|-------------------------------|
| 2/3/2003   | S3-1     | TDS = 1.5371*TSS + 41755 | 190.83                        | 16024.85                      | 42048.32876               | 162.39                | 2.62                          |
| 4/1/2003   |          |                          | 1100.96                       | 36554.23                      | 43447.28129               | 18.86                 | 1.19                          |
| 5/15/2003  |          |                          | 23599.63                      | 84130.45                      | 78029.98955               | -7.25                 | 0.93                          |
| 7/14/2003  |          |                          | 2055.12                       | 68158.06                      | 44913.92507               | -34.10                | 0.66                          |
| 8/12/2003  |          |                          | 3386.05                       | 40268.66                      | 46959.70512               | 16.62                 | 1.17                          |
| 10/8/2003  |          |                          | 880.77                        | 36390.30                      | 43108.82503               | 18.46                 | 1.18                          |
| 2/2/2004   |          |                          | 978.63                        | 22162.02                      | 43259.25003               | 95.20                 | 1.95                          |
| 4/6/2004   |          |                          | 1330.93                       | 36226.38                      | 43800.78005               | 20.91                 | 1.21                          |
| 5/19/2004  |          |                          | 4932.29                       | 53241.31                      | 49336.42017               | -7.33                 | 0.93                          |
| 6/8/2004   |          |                          | 14385.84                      | 64715.73                      | 63867.47549               | -1.31                 | 0.99                          |
| 7/12/2004  |          |                          | 1120.53                       | 47672.94                      | 43477.36629               | -8.80                 | 0.91                          |
| 8/10/2004  |          |                          | 1477.73                       | 35642.83                      | 44026.41755               | 23.52                 | 1.24                          |
| 10/6/2004  |          |                          | 38973.88                      | 44037.19                      | 101661.7576               | 130.85                | 2.31                          |
| 12/1/2004  |          |                          | 308.27                        | 10946.60                      | 42228.83876               | 285.77                | 3.86                          |
| 2/6/1995   |          |                          | 440.38                        | 16916.57                      | 42431.91252               | 150.83                | 2.51                          |
| 4/4/1995   |          |                          | 315.61                        | 18537.75                      | 42240.12064               | 127.86                | 2.28                          |
| 8/15/1995  |          |                          | 3001.94                       | 76831.74                      | 46369.28698               | -39.65                | 0.60                          |
| 10/11/1995 |          |                          | 1193.93                       | 39496.59                      | 43590.18504               | 10.36                 | 1.10                          |
| 12/7/1995  |          |                          | 954.16                        | 27595.98                      | 43221.64378               | 56.62                 | 1.57                          |
| 2/5/1996   |          |                          | 1034.90                       | 24807.70                      | 43345.74441               | 74.73                 | 1.75                          |
| 4/2/1996   |          |                          | 1291.79                       | 32131.66                      | 43740.61004               | 36.13                 | 1.36                          |
| 5/23/1996  |          |                          | 23844.29                      | 136519.38                     | 78406.05206               | -42.57                | 0.57                          |
| 7/15/1996  |          |                          | 1978.05                       | 82521.74                      | 44795.46538               | -45.72                | 0.54                          |
| 8/20/1996  |          |                          | 6269.34                       | 50338.28                      | 51391.60178               | 2.09                  | 1.02                          |
| 10/9/1996  |          |                          | 822.05                        | 25886.29                      | 43018.57003               | 66.18                 | 1.66                          |
| 12/5/1996  |          |                          | 129.67                        | 25715.82                      | 41954.31313               | 63.15                 | 1.63                          |
| 2/24/1997  |          |                          | 176.15                        | 20181.87                      | 42025.76501               | 108.24                | 2.08                          |
| 4/1/1997   |          |                          | 880.77                        | 30095.77                      | 43108.82503               | 43.24                 | 1.43                          |
| 7/14/1997  |          |                          | 6507.88                       | 107916.92                     | 51758.26272               | -52.04                | 0.48                          |
| 8/12/1997  |          |                          | 3875.37                       | 74000.18                      | 47711.83013               | -35.52                | 0.64                          |
| 10/8/1997  |          |                          | 1443.48                       | 36364.08                      | 43973.7688                | 20.93                 | 1.21                          |
| 12/4/1997  |          |                          | 792.69                        | 24696.23                      | 42973.44253               | 74.01                 | 1.74                          |

CC-40 (continued)

| Date      | Scenario | Equation                 | TSS Load (kg/day)<br>observed | TDS Load (kg/day)<br>observed | TDS (kg/day)<br>estimated | Percent<br>Difference | Ratio<br>(estimated/observed) |
|-----------|----------|--------------------------|-------------------------------|-------------------------------|---------------------------|-----------------------|-------------------------------|
| 2/3/2003  | S4-1     | TDS = 6.2398*TSS + 21234 | 190.83                        | 16024.85                      | 22424.75712               | 39.94                 | 1.40                          |
| 4/1/2003  |          |                          | 1100.96                       | 36554.23                      | 28103.75264               | -23.12                | 0.77                          |
| 2/2/2004  |          |                          | 978.63                        | 22162.02                      | 27340.44679               | 23.37                 | 1.23                          |
| 4/6/2004  |          |                          | 1330.93                       | 36226.38                      | 29538.76763               | -18.46                | 0.82                          |
| 12/1/2004 |          |                          | 308.27                        | 10946.60                      | 23157.53074               | 111.55                | 2.12                          |
| 2/6/1995  |          |                          | 440.38                        | 16916.57                      | 23981.90105               | 41.77                 | 1.42                          |
| 4/4/1995  |          |                          | 315.61                        | 18537.75                      | 23203.32909               | 25.17                 | 1.25                          |
| 12/7/1995 |          |                          | 954.16                        | 27595.98                      | 27187.78562               | -1.48                 | 0.99                          |
| 2/5/1996  |          |                          | 1034.90                       | 24807.70                      | 27691.56748               | 11.62                 | 1.12                          |
| 4/2/1996  |          |                          | 1291.79                       | 32131.66                      | 29294.50976               | -8.83                 | 0.91                          |
| 12/5/1996 |          |                          | 129.67                        | 25715.82                      | 22043.1042                | -14.28                | 0.86                          |
| 2/24/1997 |          |                          | 176.15                        | 20181.87                      | 22333.16042               | 10.66                 | 1.11                          |
| 4/1/1997  |          |                          | 880.77                        | 30095.77                      | 26729.80211               | -11.18                | 0.89                          |
| 12/4/1997 |          |                          | 792.69                        | 24696.23                      | 26180.2219                | 6.01                  | 1.06                          |

CC-50

| Date       | Scenario | Equation                 | TSS Load (kg/day)<br>observed | TDS Load (kg/day)<br>observed | TDS (kg/day)<br>estimated | Percent<br>Difference | Ratio<br>(estimated/observed) |
|------------|----------|--------------------------|-------------------------------|-------------------------------|---------------------------|-----------------------|-------------------------------|
| 4/1/2003   | S1-1     | TDS = 1.4211*TSS + 28688 | 182.02                        | 7520.66                       | 28946.67562               | 284.90                | 3.85                          |
| 5/15/2003  |          |                          | 2911.42                       | 11015.44                      | 32825.41912               | 197.99                | 2.98                          |
| 7/14/2003  |          |                          | 91.01                         | 4055.06                       | 28817.33781               | 610.65                | 7.11                          |
| 8/12/2003  |          |                          | 85.63                         | 2975.15                       | 28809.6888                | 868.34                | 9.68                          |
| 10/8/2003  |          |                          | 120.86                        | 3095.80                       | 28859.75505               | 832.22                | 9.32                          |
| 12/4/2003  |          |                          | 63.61                         | 1977.53                       | 28778.39739               | 1355.27               | 14.55                         |
| 2/2/2004   |          |                          | 43.06                         | 2574.86                       | 28749.19208               | 1016.53               | 11.17                         |
| 4/6/2004   |          |                          | 195.73                        | 5271.68                       | 28966.14582               | 449.47                | 5.49                          |
| 5/19/2004  |          |                          | 254.44                        | 6819.08                       | 29049.58957               | 326.00                | 4.26                          |
| 6/8/2004   |          |                          | 220.19                        | 3983.26                       | 29000.91405               | 628.07                | 7.28                          |
| 7/12/2004  |          |                          | 188.39                        | 4111.12                       | 28955.71535               | 604.33                | 7.04                          |
| 8/10/2004  |          |                          | 159.27                        | 5289.87                       | 28914.34116               | 446.60                | 5.47                          |
| 12/1/2004  |          |                          | 29.36                         | 1485.12                       | 28729.72187               | 1834.51               | 19.35                         |
| 2/6/1995   |          |                          | 41.10                         | 1767.06                       | 28746.41062               | 1526.79               | 16.27                         |
| 4/4/1995   |          |                          | 66.06                         | 2177.52                       | 28781.87422               | 1221.77               | 13.22                         |
| 5/25/1995  |          |                          | 18789.67                      | 47209.04                      | 55389.999                 | 17.33                 | 1.17                          |
| 6/14/1995  |          |                          | 37726.13                      | 65297.65                      | 82300.60738               | 26.04                 | 1.26                          |
| 7/10/1995  |          |                          | 895.45                        | 13568.83                      | 29960.51714               | 120.80                | 2.21                          |
| 8/15/1995  |          |                          | 178.11                        | 1813.88                       | 28941.1127                | 1495.54               | 15.96                         |
| 10/11/1995 |          |                          | 155.60                        | 3718.37                       | 28909.12593               | 677.47                | 7.77                          |
| 12/7/1995  |          |                          | 66.06                         | 2719.44                       | 28781.87422               | 958.38                | 10.58                         |
| 2/5/1996   |          |                          | 106.43                        | 2833.20                       | 28839.24179               | 917.90                | 10.18                         |
| 4/2/1996   |          |                          | 356.71                        | 5271.18                       | 29194.92076               | 453.86                | 5.54                          |
| 5/23/1996  |          |                          | 3048.43                       | 12225.50                      | 33020.12119               | 170.09                | 2.70                          |
| 6/19/1996  |          |                          | 763.33                        | 8566.47                       | 29772.76871               | 247.55                | 3.48                          |
| 7/15/1996  |          |                          | 337.63                        | 4484.86                       | 29167.80154               | 550.36                | 6.50                          |
| 12/5/1996  |          |                          | 29.36                         | 2896.47                       | 28729.72187               | 891.89                | 9.92                          |
| 2/24/1997  |          |                          | 32.29                         | 2344.06                       | 28733.89406               | 1125.82               | 12.26                         |
| 4/1/1997   |          |                          | 108.63                        | 4730.74                       | 28842.37093               | 509.68                | 6.10                          |
| 6/18/1997  |          |                          | 3596.46                       | 22489.86                      | 33798.9295                | 50.29                 | 1.50                          |
| 7/14/1997  |          |                          | 371.88                        | 6883.01                       | 29216.47706               | 324.47                | 4.24                          |
| 8/12/1997  |          |                          | 269.12                        | 5571.65                       | 29070.45051               | 421.76                | 5.22                          |
| 10/8/1997  |          |                          | 139.45                        | 3301.35                       | 28886.1789                | 774.98                | 8.75                          |
| 12/4/1997  |          |                          | 41.10                         | 2574.86                       | 28746.41062               | 1016.43               | 11.16                         |
| 2/5/2007   |          |                          | 55.78                         | 3058.42                       | 28767.27156               | 840.59                | 9.41                          |
| 4/10/2007  |          |                          | 900.34                        | 14929.86                      | 29967.47079               | 100.72                | 2.01                          |
| 5/24/2007  |          |                          | 5852.20                       | 22017.77                      | 37004.56011               | 68.07                 | 1.68                          |
| 6/13/2007  |          |                          | 1394.55                       | 13267.71                      | 30669.78899               | 131.16                | 2.31                          |
| 7/16/2007  |          |                          | 282.58                        | 4707.95                       | 29089.57303               | 517.88                | 6.18                          |
| 8/14/2007  |          |                          | 1557.24                       | 3865.90                       | 30900.9977                | 699.32                | 7.99                          |
| 10/17/2007 |          |                          | 146.30                        | 4599.60                       | 28895.914                 | 528.23                | 6.28                          |
| 2/11/2008  |          |                          | 72.66                         | 4102.76                       | 28791.26164               | 601.75                | 7.02                          |
| 4/8/2008   |          |                          | 33.03                         | 4595.51                       | 28734.93711               | 525.28                | 6.25                          |
| 5/22/2008  |          |                          | 11068.29                      | 15259.34                      | 44417.14629               | 191.08                | 2.91                          |
| 6/18/2008  |          |                          | 782.90                        | 7540.33                       | 29800.58329               | 295.22                | 3.95                          |
| 7/28/2008  |          |                          | 90.03                         | 2706.98                       | 28815.94708               | 964.51                | 10.65                         |
| 8/19/2008  |          |                          | 267.17                        | 2333.41                       | 29067.66905               | 1145.72               | 12.46                         |
| 12/4/2008  |          |                          | 58.23                         | 1906.07                       | 28770.74838               | 1409.43               | 15.09                         |
| 2/2/2009   |          |                          | 18.35                         | 2577.65                       | 28714.07617               | 1013.96               | 11.14                         |
| 4/7/2009   |          |                          | 36.21                         | 3451.01                       | 28739.45698               | 732.78                | 8.33                          |
| 5/28/2009  |          |                          | 1781.10                       | 12116.99                      | 31219.12699               | 157.65                | 2.58                          |
| 6/16/2009  |          |                          | 452.62                        | 9279.53                       | 29331.21222               | 216.09                | 3.16                          |
| 7/13/2009  |          |                          | 296.04                        | 4922.53                       | 29108.69556               | 491.34                | 5.91                          |
| 8/11/2009  |          |                          | 161.47                        | 1979.83                       | 28917.4703                | 1360.60               | 14.61                         |
| 10/11/2009 |          |                          | 56.27                         | 2510.93                       | 28767.96692               | 1045.71               | 11.46                         |
| 12/3/2009  |          |                          | 144.10                        | 3800.98                       | 28892.78486               | 660.14                | 7.60                          |

CC-50 (continued)

| Date       | Scenario | Equation                  | TSS Load (kg/day)<br>observed | TDS Load (kg/day)<br>observed | TDS (kg/day)<br>estimated | Percent<br>Difference | Ratio<br>(estimated/observed) |
|------------|----------|---------------------------|-------------------------------|-------------------------------|---------------------------|-----------------------|-------------------------------|
| 4/1/2003   | S3-3     | TDS = 2.1555*TSS + 3384.4 | 182.02                        | 7520.66                       | 3776.754717               | -49.78                | 0.50                          |
| 5/15/2003  |          |                           | 2911.42                       | 11015.44                      | 9659.966045               | -12.31                | 0.88                          |
| 7/14/2003  |          |                           | 91.01                         | 4055.06                       | 3580.577359               | -11.70                | 0.88                          |
| 8/12/2003  |          |                           | 85.63                         | 2975.15                       | 3568.975472               | 19.96                 | 1.20                          |
| 10/8/2003  |          |                           | 120.86                        | 3095.80                       | 3644.915095               | 17.74                 | 1.18                          |
| 12/4/2003  |          |                           | 63.61                         | 1977.53                       | 3521.513208               | 78.08                 | 1.78                          |
| 2/2/2004   |          |                           | 43.06                         | 2574.86                       | 3477.215094               | 35.04                 | 1.35                          |
| 4/6/2004   |          |                           | 195.73                        | 5271.68                       | 3806.286793               | -27.80                | 0.72                          |
| 5/19/2004  |          |                           | 254.44                        | 6819.08                       | 3932.852831               | -42.33                | 0.58                          |
| 6/8/2004   |          |                           | 220.19                        | 3983.26                       | 3859.022642               | -3.12                 | 0.97                          |
| 7/12/2004  |          |                           | 188.39                        | 4111.12                       | 3790.466038               | -7.80                 | 0.92                          |
| 8/10/2004  |          |                           | 159.27                        | 5289.87                       | 3727.710378               | -29.53                | 0.70                          |
| 12/1/2004  |          |                           | 29.36                         | 1485.12                       | 3447.683019               | 132.15                | 2.32                          |
| 2/6/1995   |          |                           | 41.10                         | 1767.06                       | 3472.996227               | 96.54                 | 1.97                          |
| 4/4/1995   |          |                           | 66.06                         | 2177.52                       | 3526.786793               | 61.96                 | 1.62                          |
| 5/25/1995  |          |                           | 18789.67                      | 47209.04                      | 43885.53212               | -7.04                 | 0.93                          |
| 6/14/1995  |          |                           | 37726.13                      | 65297.65                      | 84703.07933               | 29.72                 | 1.30                          |
| 7/10/1995  |          |                           | 895.45                        | 13568.83                      | 5314.532078               | -60.83                | 0.39                          |
| 8/15/1995  |          |                           | 178.11                        | 1813.88                       | 3768.316982               | 107.75                | 2.08                          |
| 10/11/1995 |          |                           | 155.60                        | 3718.37                       | 3719.8                    | 0.04                  | 1.00                          |
| 12/7/1995  |          |                           | 66.06                         | 2719.44                       | 3526.786793               | 29.69                 | 1.30                          |
| 2/5/1996   |          |                           | 106.43                        | 2833.20                       | 3613.800944               | 27.55                 | 1.28                          |
| 4/2/1996   |          |                           | 356.71                        | 5271.18                       | 4153.28868                | -21.21                | 0.79                          |
| 5/23/1996  |          |                           | 3048.43                       | 12225.50                      | 9955.2868                 | -18.57                | 0.81                          |
| 6/19/1996  |          |                           | 763.33                        | 8566.47                       | 5029.758492               | -41.29                | 0.59                          |
| 7/15/1996  |          |                           | 337.63                        | 4484.86                       | 4112.154718               | -8.31                 | 0.92                          |
| 12/5/1996  |          |                           | 29.36                         | 2896.47                       | 3447.683019               | 19.03                 | 1.19                          |
| 2/24/1997  |          |                           | 32.29                         | 2344.06                       | 3454.011321               | 47.35                 | 1.47                          |
| 4/1/1997   |          |                           | 108.63                        | 4730.74                       | 3618.54717                | -23.51                | 0.76                          |
| 6/18/1997  |          |                           | 3596.46                       | 22489.86                      | 11136.56982               | -50.48                | 0.50                          |
| 7/14/1997  |          |                           | 371.88                        | 6883.01                       | 4185.984907               | -39.18                | 0.61                          |
| 8/12/1997  |          |                           | 269.12                        | 5571.65                       | 3964.49434                | -28.85                | 0.71                          |
| 10/8/1997  |          |                           | 139.45                        | 3301.35                       | 3684.99434                | 11.62                 | 1.12                          |
| 12/4/1997  |          |                           | 41.10                         | 2574.86                       | 3472.996227               | 34.88                 | 1.35                          |
| 2/5/2007   |          |                           | 55.78                         | 3058.42                       | 3504.637736               | 14.59                 | 1.15                          |
| 4/10/2007  |          |                           | 900.34                        | 14929.86                      | 5325.079247               | -64.33                | 0.36                          |
| 5/24/2007  |          |                           | 5852.20                       | 22017.77                      | 15998.81511               | -27.34                | 0.73                          |
| 6/13/2007  |          |                           | 1394.55                       | 13267.71                      | 6390.343399               | -51.84                | 0.48                          |
| 7/16/2007  |          |                           | 282.58                        | 4707.95                       | 3993.499057               | -15.18                | 0.85                          |
| 8/14/2007  |          |                           | 1557.24                       | 3865.90                       | 6741.036796               | 74.37                 | 1.74                          |
| 10/17/2007 |          |                           | 146.30                        | 4599.60                       | 3699.760378               | -19.56                | 0.80                          |
| 2/11/2008  |          |                           | 72.66                         | 4102.76                       | 3541.025472               | -13.69                | 0.86                          |
| 4/8/2008   |          |                           | 33.03                         | 4595.51                       | 3455.593396               | -24.80                | 0.75                          |
| 5/22/2008  |          |                           | 11068.29                      | 15259.34                      | 27242.09814               | 78.53                 | 1.79                          |
| 6/18/2008  |          |                           | 782.90                        | 7540.33                       | 5071.947172               | -32.74                | 0.67                          |
| 7/28/2008  |          |                           | 90.03                         | 2706.98                       | 3578.467925               | 32.19                 | 1.32                          |
| 8/19/2008  |          |                           | 267.17                        | 2333.41                       | 3960.275472               | 69.72                 | 1.70                          |
| 12/4/2008  |          |                           | 58.23                         | 1906.07                       | 3509.911321               | 84.14                 | 1.84                          |
| 2/2/2009   |          |                           | 18.35                         | 2577.65                       | 3423.951887               | 32.83                 | 1.33                          |
| 4/7/2009   |          |                           | 36.21                         | 3451.01                       | 3462.449057               | 0.33                  | 1.00                          |
| 5/28/2009  |          |                           | 1781.10                       | 12116.99                      | 7223.569815               | -40.38                | 0.60                          |
| 6/16/2009  |          |                           | 452.62                        | 9279.53                       | 4360.013209               | -53.01                | 0.47                          |
| 7/13/2009  |          |                           | 296.04                        | 4922.53                       | 4022.503774               | -18.28                | 0.82                          |
| 8/11/2009  |          |                           | 161.47                        | 1979.83                       | 3732.456604               | 88.52                 | 1.89                          |
| 10/11/2009 |          |                           | 56.27                         | 2510.93                       | 3505.692453               | 39.62                 | 1.40                          |
| 12/3/2009  |          |                           | 144.10                        | 3800.98                       | 3695.014151               | -2.79                 | 0.97                          |

CC-50 (continued)

| Date       | Scenario | Equation                  | TSS Load (kg/day)<br>observed | TDS Load (kg/day)<br>observed | TDS (kg/day)<br>estimated | Percent<br>Difference | Ratio<br>(estimated/observed) |
|------------|----------|---------------------------|-------------------------------|-------------------------------|---------------------------|-----------------------|-------------------------------|
| 4/1/2003   | S4-3     | TDS = 8.1163*TSS + 1825.9 | 182.02                        | 7520.66                       | 3303.268867               | -56.08                | 0.44                          |
| 8/12/2003  |          |                           | 85.63                         | 2975.15                       | 2520.898795               | -15.27                | 0.85                          |
| 10/8/2003  |          |                           | 120.86                        | 3095.80                       | 2806.841156               | -9.33                 | 0.91                          |
| 12/4/2003  |          |                           | 63.61                         | 1977.53                       | 2342.184819               | 18.44                 | 1.18                          |
| 2/2/2004   |          |                           | 43.06                         | 2574.86                       | 2175.385108               | -15.51                | 0.84                          |
| 4/6/2004   |          |                           | 195.73                        | 5271.68                       | 3414.468674               | -35.23                | 0.65                          |
| 12/1/2004  |          |                           | 29.36                         | 1485.12                       | 2064.185301               | 38.99                 | 1.39                          |
| 2/6/1995   |          |                           | 41.10                         | 1767.06                       | 2159.499422               | 22.21                 | 1.22                          |
| 4/4/1995   |          |                           | 66.06                         | 2177.52                       | 2362.041928               | 8.47                  | 1.08                          |
| 10/11/1995 |          |                           | 155.60                        | 3718.37                       | 3088.812096               | -16.93                | 0.83                          |
| 12/7/1995  |          |                           | 66.06                         | 2719.44                       | 2362.041928               | -13.14                | 0.87                          |
| 2/5/1996   |          |                           | 106.43                        | 2833.20                       | 2689.684217               | -5.07                 | 0.95                          |
| 4/2/1996   |          |                           | 356.71                        | 5271.18                       | 4721.066409               | -10.44                | 0.90                          |
| 12/5/1996  |          |                           | 29.36                         | 2896.47                       | 2064.185301               | -28.73                | 0.71                          |
| 2/24/1997  |          |                           | 32.29                         | 2344.06                       | 2088.013831               | -10.92                | 0.89                          |
| 4/1/1997   |          |                           | 108.63                        | 4730.74                       | 2707.555614               | -42.77                | 0.57                          |
| 10/8/1997  |          |                           | 139.45                        | 3301.35                       | 2957.75518                | -10.41                | 0.90                          |
| 12/4/1997  |          |                           | 41.10                         | 2574.86                       | 2159.499422               | -16.13                | 0.84                          |
| 2/5/2007   |          |                           | 55.78                         | 3058.42                       | 2278.642072               | -25.50                | 0.75                          |
| 7/16/2007  |          |                           | 282.58                        | 4707.95                       | 4119.396023               | -12.50                | 0.87                          |
| 8/14/2007  |          |                           | 1557.24                       | 3865.90                       | 14464.94951               | 274.17                | 3.74                          |
| 10/17/2007 |          |                           | 146.30                        | 4599.60                       | 3013.355084               | -34.49                | 0.66                          |
| 2/11/2008  |          |                           | 72.66                         | 4102.76                       | 2415.65612                | -41.12                | 0.59                          |
| 4/8/2008   |          |                           | 33.03                         | 4595.51                       | 2093.970964               | -54.43                | 0.46                          |
| 7/28/2008  |          |                           | 90.03                         | 2706.98                       | 2556.64159                | -5.55                 | 0.94                          |
| 8/19/2008  |          |                           | 267.17                        | 2333.41                       | 3994.29624                | 71.18                 | 1.71                          |
| 12/4/2008  |          |                           | 58.23                         | 1906.07                       | 2298.499181               | 20.59                 | 1.21                          |
| 2/2/2009   |          |                           | 18.35                         | 2577.65                       | 1974.828313               | -23.39                | 0.77                          |
| 4/7/2009   |          |                           | 36.21                         | 3451.01                       | 2119.785205               | -38.58                | 0.61                          |
| 8/11/2009  |          |                           | 161.47                        | 1979.83                       | 3136.469156               | 58.42                 | 1.58                          |
| 10/11/2009 | 56.27    | 2510.93                   | 2282.613494                   | -9.09                         | 0.91                      |                       |                               |
| 12/3/2009  | 144.10   | 3800.98                   | 2995.483686                   | -21.19                        | 0.79                      |                       |                               |

CC-50 (continued)

| Date      | Scenario | Equation                  | TSS Load (kg/day)<br>observed | TDS Load (kg/day)<br>observed | TDS (kg/day)<br>estimated | Percent<br>Difference | Ratio<br>(estimated/observed) |
|-----------|----------|---------------------------|-------------------------------|-------------------------------|---------------------------|-----------------------|-------------------------------|
| 5/15/2003 | S4-9     | TDS = 1.8646*TSS + 4646.4 | 2911.42                       | 11015.44                      | 10075.03393               | -8.54                 | 0.91                          |
| 7/14/2003 |          |                           | 91.01                         | 4055.06                       | 4816.101834               | 18.77                 | 1.19                          |
| 5/19/2004 |          |                           | 254.44                        | 6819.08                       | 5120.835235               | -24.90                | 0.75                          |
| 6/8/2004  |          |                           | 220.19                        | 3983.26                       | 5056.968953               | 26.96                 | 1.27                          |
| 7/12/2004 |          |                           | 188.39                        | 4111.12                       | 4997.664549               | 21.56                 | 1.22                          |
| 8/10/2004 |          |                           | 159.27                        | 5289.87                       | 4943.378209               | -6.55                 | 0.93                          |
| 5/25/1995 |          |                           | 18789.67                      | 47209.04                      | 39681.61733               | -15.94                | 0.84                          |
| 6/14/1995 |          |                           | 37726.13                      | 65297.65                      | 74990.54729               | 14.84                 | 1.15                          |
| 7/10/1995 |          |                           | 895.45                        | 13568.83                      | 6316.047076               | -53.45                | 0.47                          |
| 8/15/1995 |          |                           | 178.11                        | 1813.88                       | 4978.504664               | 174.47                | 2.74                          |
| 5/23/1996 |          |                           | 3048.43                       | 12225.50                      | 10330.49906               | -15.50                | 0.84                          |
| 6/19/1996 |          |                           | 763.33                        | 8566.47                       | 6069.705704               | -29.15                | 0.71                          |
| 7/15/1996 |          |                           | 337.63                        | 4484.86                       | 5275.939061               | 17.64                 | 1.18                          |
| 6/18/1997 |          |                           | 3596.46                       | 22489.86                      | 11352.35957               | -49.52                | 0.50                          |
| 7/14/1997 |          |                           | 371.88                        | 6883.01                       | 5339.805343               | -22.42                | 0.78                          |
| 8/12/1997 |          |                           | 269.12                        | 5571.65                       | 5148.206498               | -7.60                 | 0.92                          |
| 4/10/2007 |          |                           | 900.34                        | 14929.86                      | 6325.17083                | -57.63                | 0.42                          |
| 5/24/2007 |          |                           | 5852.20                       | 22017.77                      | 15558.4104                | -29.34                | 0.71                          |
| 6/13/2007 |          |                           | 1394.55                       | 13267.71                      | 7246.670036               | -45.38                | 0.55                          |
| 5/22/2008 |          |                           | 11068.29                      | 15259.34                      | 25284.33271               | 65.70                 | 1.66                          |
| 6/18/2008 |          |                           | 782.90                        | 7540.33                       | 6106.200722               | -19.02                | 0.81                          |
| 5/28/2009 |          |                           | 1781.10                       | 12116.99                      | 7967.446643               | -34.25                | 0.66                          |
| 6/16/2009 |          |                           | 452.62                        | 9279.53                       | 5490.347292               | -40.83                | 0.59                          |
| 7/13/2009 |          |                           | 296.04                        | 4922.53                       | 5198.387148               | 5.60                  | 1.06                          |

CC-60

| Date       | Scenario | Equation                 | TSS Load (kg/day)<br>observed | TDS Load (kg/day)<br>observed | TDS (kg/day)<br>estimated | Percent<br>Difference | Ratio<br>(estimated/observed) |
|------------|----------|--------------------------|-------------------------------|-------------------------------|---------------------------|-----------------------|-------------------------------|
| 2/3/2003   | S1-1     | TDS = 1.4211*TSS + 28688 | 381.67                        | 17303.43                      | 29230.38435               | 68.93                 | 1.69                          |
| 4/1/2003   |          |                          | 1856.95                       | 57231.13                      | 31326.9085                | -45.26                | 0.55                          |
| 6/11/2003  |          |                          | 14985.25                      | 149167.47                     | 49983.53957               | -66.49                | 0.34                          |
| 10/8/2003  |          |                          | 626.32                        | 43222.50                      | 29578.06663               | -31.57                | 0.68                          |
| 12/4/2003  |          |                          | 2194.57                       | 19340.96                      | 31806.71004               | 64.45                 | 1.64                          |
| 4/6/2004   |          |                          | 890.55                        | 51313.61                      | 29953.56349               | -41.63                | 0.58                          |
| 5/19/2004  |          |                          | 1071.60                       | 55283.76                      | 30210.84838               | -45.35                | 0.55                          |
| 6/8/2004   |          |                          | 42413.76                      | 63292.90                      | 88962.19984               | 40.56                 | 1.41                          |
| 7/12/2004  |          |                          | 1526.66                       | 46369.77                      | 30857.53742               | -33.45                | 0.67                          |
| 8/10/2004  |          |                          | 16184.07                      | 38313.09                      | 51687.18274               | 34.91                 | 1.35                          |
| 12/1/2004  |          |                          | 1027.56                       | 20653.96                      | 30148.26557               | 45.97                 | 1.46                          |
| 2/6/1995   |          |                          | 538.25                        | 12405.49                      | 29452.90101               | 137.42                | 2.37                          |
| 4/4/1995   |          |                          | 342.52                        | 17269.00                      | 29174.75519               | 68.94                 | 1.69                          |
| 10/11/1995 |          |                          | 415.92                        | 30374.43                      | 29279.05987               | -3.61                 | 0.96                          |
| 12/7/1995  |          |                          | 748.65                        | 23491.42                      | 29751.90777               | 26.65                 | 1.27                          |
| 2/5/1996   |          |                          | 782.90                        | 23735.66                      | 29800.58329               | 25.55                 | 1.26                          |
| 4/2/1996   |          |                          | 1937.68                       | 38121.30                      | 31441.64365               | -17.52                | 0.82                          |
| 5/23/1996  |          |                          | 30337.49                      | 121956.70                     | 71800.60256               | -41.13                | 0.59                          |
| 7/15/1996  |          |                          | 6224.08                       | 70753.24                      | 37533.03717               | -46.95                | 0.53                          |
| 10/9/1996  |          |                          | 406.13                        | 21169.98                      | 29265.15258               | 38.24                 | 1.38                          |
| 12/5/1996  |          |                          | 782.90                        | 21899.75                      | 29800.58329               | 36.08                 | 1.36                          |
| 2/24/1997  |          |                          | 210.41                        | 25022.43                      | 28987.00676               | 15.84                 | 1.16                          |
| 4/1/1997   |          |                          | 636.11                        | 33669.23                      | 29591.97392               | -12.11                | 0.88                          |
| 7/14/1997  |          |                          | 5715.19                       | 96686.74                      | 36809.85803               | -61.93                | 0.38                          |
| 8/12/1997  |          |                          | 9776.50                       | 68777.68                      | 42581.38386               | -38.09                | 0.62                          |
| 10/8/1997  |          |                          | 1027.56                       | 33390.56                      | 30148.26557               | -9.71                 | 0.90                          |
| 12/4/1997  |          |                          | 234.87                        | 23289.80                      | 29021.77499               | 24.61                 | 1.25                          |
| 2/5/2007   |          |                          | 308.27                        | 25197.83                      | 29126.07967               | 15.59                 | 1.16                          |
| 4/10/2007  |          |                          | 4146.94                       | 68535.07                      | 34581.21462               | -49.54                | 0.50                          |
| 5/24/2007  |          |                          | 53922.44                      | 164444.84                     | 105317.1742               | -35.96                | 0.64                          |
| 6/13/2007  |          |                          | 83190.77                      | 137084.90                     | 146910.4052               | 7.17                  | 1.07                          |
| 7/16/2007  |          |                          | 4447.87                       | 52647.92                      | 35008.86383               | -33.50                | 0.66                          |
| 8/14/2007  |          |                          | 2422.11                       | 37865.59                      | 32130.05456               | -15.15                | 0.85                          |
| 10/17/2007 |          |                          | 609.20                        | 37414.81                      | 29553.72887               | -21.01                | 0.79                          |
| 2/11/2008  |          |                          | 352.31                        | 30607.20                      | 29188.66248               | -4.63                 | 0.95                          |
| 4/8/2008   |          |                          | 239.76                        | 32690.62                      | 29028.72863               | -11.20                | 0.89                          |
| 5/22/2008  |          |                          | 63366.20                      | 134158.92                     | 118737.7102               | -11.49                | 0.89                          |
| 6/18/2008  |          |                          | 19699.79                      | 103191.10                     | 56683.37708               | -45.07                | 0.55                          |
| 8/19/2008  |          |                          | 5959.85                       | 47251.66                      | 37157.54031               | -21.36                | 0.79                          |
| 10/15/2008 |          |                          | 919.91                        | 36209.99                      | 29995.28537               | -17.16                | 0.83                          |
| 12/4/2008  | 1507.09  | 16805.11                 | 30829.72284                   | 83.45                         | 1.83                      |                       |                               |
| 2/2/2009   | 215.30   | 26974.72                 | 28993.96041                   | 7.49                          | 1.07                      |                       |                               |
| 4/7/2009   | 939.48   | 28797.52                 | 30023.09995                   | 4.26                          | 1.04                      |                       |                               |
| 5/28/2009  | 29564.37 | 126146.50                | 70701.92656                   | -43.95                        | 0.56                      |                       |                               |
| 6/16/2009  | 11012.02 | 51646.37                 | 44337.17936                   | -14.15                        | 0.86                      |                       |                               |
| 7/13/2009  | 7689.57  | 72128.21                 | 39615.65402                   | -45.08                        | 0.55                      |                       |                               |
| 8/11/2009  | 1282.00  | 27486.15                 | 30509.85514                   | 11.00                         | 1.11                      |                       |                               |
| 10/14/2009 | 1027.56  | 31784.14                 | 30148.26557                   | -5.15                         | 0.95                      |                       |                               |
| 12/3/2009  | 234.87   | 28325.43                 | 29021.77499                   | 2.46                          | 1.02                      |                       |                               |

CC-60 (continued)

| Date       | Scenario | Equation                 | TSS Load (kg/day)<br>observed | TDS Load (kg/day)<br>observed | TDS (kg/day)<br>estimated | Percent<br>Difference | Ratio<br>(estimated/observed) |
|------------|----------|--------------------------|-------------------------------|-------------------------------|---------------------------|-----------------------|-------------------------------|
| 2/3/2003   | S2-1     | TDS = 1.1889*TSS + 42716 | 381.67                        | 17303.43                      | 43169.76171               | 149.49                | 2.49                          |
| 4/1/2003   |          |                          | 1856.95                       | 57231.13                      | 44923.72522               | -21.50                | 0.78                          |
| 6/11/2003  |          |                          | 14985.25                      | 149167.47                     | 60531.96439               | -59.42                | 0.41                          |
| 10/8/2003  |          |                          | 626.32                        | 43222.50                      | 43460.63459               | 0.55                  | 1.01                          |
| 12/4/2003  |          |                          | 2194.57                       | 19340.96                      | 45325.12981               | 134.35                | 2.34                          |
| 4/6/2004   |          |                          | 890.55                        | 51313.61                      | 43774.77731               | -14.69                | 0.85                          |
| 5/19/2004  |          |                          | 1071.60                       | 55283.76                      | 43990.02325               | -20.43                | 0.80                          |
| 6/8/2004   |          |                          | 42413.76                      | 63292.90                      | 93141.72387               | 47.16                 | 1.47                          |
| 7/12/2004  |          |                          | 1526.66                       | 46369.77                      | 44531.04682               | -3.97                 | 0.96                          |
| 8/10/2004  |          |                          | 16184.07                      | 38313.09                      | 61957.24154               | 61.71                 | 1.62                          |
| 12/1/2004  |          |                          | 1027.56                       | 20653.96                      | 43937.66613               | 112.73                | 2.13                          |
| 2/6/1995   |          |                          | 538.25                        | 12405.49                      | 43355.92035               | 249.49                | 3.49                          |
| 4/4/1995   |          |                          | 342.52                        | 17269.00                      | 43123.22204               | 149.71                | 2.50                          |
| 10/11/1995 |          |                          | 415.92                        | 30374.43                      | 43210.48391               | 42.26                 | 1.42                          |
| 12/7/1995  |          |                          | 748.65                        | 23491.42                      | 43606.07104               | 85.63                 | 1.86                          |
| 2/5/1996   |          |                          | 782.90                        | 23735.66                      | 43646.79324               | 83.89                 | 1.84                          |
| 4/2/1996   |          |                          | 1937.68                       | 38121.30                      | 45019.71327               | 18.10                 | 1.18                          |
| 5/23/1996  |          |                          | 30337.49                      | 121956.70                     | 78784.23811               | -35.40                | 0.65                          |
| 7/15/1996  |          |                          | 6224.08                       | 70753.24                      | 50115.80627               | -29.17                | 0.71                          |
| 10/9/1996  |          |                          | 406.13                        | 21169.98                      | 43198.84899               | 104.06                | 2.04                          |
| 12/5/1996  |          |                          | 782.90                        | 21899.75                      | 43646.79324               | 99.30                 | 1.99                          |
| 2/24/1997  |          |                          | 210.41                        | 25022.43                      | 42966.15068               | 71.71                 | 1.72                          |
| 4/1/1997   |          |                          | 636.11                        | 33669.23                      | 43472.26951               | 29.12                 | 1.29                          |
| 7/14/1997  |          |                          | 5715.19                       | 96686.74                      | 49510.79066               | -48.79                | 0.51                          |
| 8/12/1997  |          |                          | 9776.50                       | 68777.68                      | 54339.2806                | -20.99                | 0.79                          |
| 10/8/1997  |          |                          | 1027.56                       | 33390.56                      | 43937.66613               | 31.59                 | 1.32                          |
| 12/4/1997  |          |                          | 234.87                        | 23289.80                      | 42995.23797               | 84.61                 | 1.85                          |
| 2/5/2007   |          |                          | 308.27                        | 25197.83                      | 43082.49984               | 70.98                 | 1.71                          |
| 4/10/2007  |          |                          | 4146.94                       | 68535.07                      | 47646.29545               | -30.48                | 0.70                          |
| 5/24/2007  |          |                          | 53922.44                      | 164444.84                     | 106824.3845               | -35.04                | 0.65                          |
| 6/13/2007  |          |                          | 83190.77                      | 137084.90                     | 141621.5081               | 3.31                  | 1.03                          |
| 7/16/2007  |          |                          | 4447.87                       | 52647.92                      | 48004.0691                | -8.82                 | 0.91                          |
| 8/14/2007  |          |                          | 2422.11                       | 37865.59                      | 45595.64159               | 20.41                 | 1.20                          |
| 10/17/2007 |          |                          | 609.20                        | 37414.81                      | 43440.27349               | 16.10                 | 1.16                          |
| 2/11/2008  |          |                          | 352.31                        | 30607.20                      | 43134.85696               | 40.93                 | 1.41                          |
| 4/8/2008   |          |                          | 239.76                        | 32690.62                      | 43001.05543               | 31.54                 | 1.32                          |
| 5/22/2008  |          |                          | 63366.20                      | 134158.92                     | 118052.078                | -12.01                | 0.88                          |
| 6/18/2008  |          |                          | 19699.79                      | 103191.10                     | 66137.08494               | -35.91                | 0.64                          |
| 8/19/2008  |          |                          | 5959.85                       | 47251.66                      | 49801.66355               | 5.40                  | 1.05                          |
| 10/15/2008 |          |                          | 919.91                        | 36209.99                      | 43809.68206               | 20.99                 | 1.21                          |
| 12/4/2008  |          |                          | 1507.09                       | 16805.11                      | 44507.77699               | 164.85                | 2.65                          |
| 2/2/2009   |          |                          | 215.30                        | 26974.72                      | 42971.96814               | 59.30                 | 1.59                          |
| 4/7/2009   | 939.48   | 28797.52                 | 43832.95189                   | 52.21                         | 1.52                      |                       |                               |
| 5/28/2009  | 29564.37 | 126146.50                | 77865.07979                   | -38.27                        | 0.62                      |                       |                               |
| 6/16/2009  | 11012.02 | 51646.37                 | 55808.18869                   | 8.06                          | 1.08                      |                       |                               |
| 7/13/2009  | 7689.57  | 72128.21                 | 51858.13487                   | -28.10                        | 0.72                      |                       |                               |
| 8/11/2009  | 1282.00  | 27486.15                 | 44240.17393                   | 60.95                         | 1.61                      |                       |                               |
| 10/14/2009 | 1027.56  | 31784.14                 | 43937.66613                   | 38.24                         | 1.38                      |                       |                               |
| 12/3/2009  | 234.87   | 28325.43                 | 42995.23797                   | 51.79                         | 1.52                      |                       |                               |

CC-60 (continued)

| Date       | Scenario | Equation                 | TSS Load (kg/day)<br>observed | TDS Load (kg/day)<br>observed | TDS (kg/day)<br>estimated | Percent<br>Difference | Ratio<br>(estimated/observed) |
|------------|----------|--------------------------|-------------------------------|-------------------------------|---------------------------|-----------------------|-------------------------------|
| 2/3/2003   | S3-5     | TDS = 1.1395*TSS + 42435 | 381.67                        | 17303.43                      | 42869.90745               | 147.75                | 2.48                          |
| 4/1/2003   |          |                          | 1856.95                       | 57231.13                      | 44550.992                 | -22.16                | 0.78                          |
| 6/11/2003  |          |                          | 14985.25                      | 149167.47                     | 59510.69301               | -60.10                | 0.40                          |
| 10/8/2003  |          |                          | 626.32                        | 43222.50                      | 43148.69427               | -0.17                 | 1.00                          |
| 12/4/2003  |          |                          | 2194.57                       | 19340.96                      | 44935.71782               | 132.33                | 2.32                          |
| 4/6/2004   |          |                          | 890.55                        | 51313.61                      | 43449.78404               | -15.33                | 0.85                          |
| 5/19/2004  |          |                          | 1071.60                       | 55283.76                      | 43656.08629               | -21.03                | 0.79                          |
| 6/8/2004   |          |                          | 42413.76                      | 63292.90                      | 90765.48393               | 43.41                 | 1.43                          |
| 7/12/2004  |          |                          | 1526.66                       | 46369.77                      | 44174.62979               | -4.73                 | 0.95                          |
| 8/10/2004  |          |                          | 16184.07                      | 38313.09                      | 60876.74845               | 58.89                 | 1.59                          |
| 12/1/2004  |          |                          | 1027.56                       | 20653.96                      | 43605.90466               | 111.13                | 2.11                          |
| 2/6/1995   |          |                          | 538.25                        | 12405.49                      | 43048.33101               | 247.01                | 3.47                          |
| 4/4/1995   |          |                          | 342.52                        | 17269.00                      | 42825.30155               | 147.99                | 2.48                          |
| 10/11/1995 |          |                          | 415.92                        | 30374.43                      | 42908.9376                | 41.27                 | 1.41                          |
| 12/7/1995  |          |                          | 748.65                        | 23491.42                      | 43288.08768               | 84.27                 | 1.84                          |
| 2/5/1996   |          |                          | 782.90                        | 23735.66                      | 43327.11784               | 82.54                 | 1.83                          |
| 4/2/1996   |          |                          | 1937.68                       | 38121.30                      | 44642.99165               | 17.11                 | 1.17                          |
| 5/23/1996  |          |                          | 30337.49                      | 121956.70                     | 77004.56626               | -36.86                | 0.63                          |
| 7/15/1996  |          |                          | 6224.08                       | 70753.24                      | 49527.33682               | -30.00                | 0.70                          |
| 10/9/1996  |          |                          | 406.13                        | 21169.98                      | 42897.78613               | 102.64                | 2.03                          |
| 12/5/1996  |          |                          | 782.90                        | 21899.75                      | 43327.11784               | 97.84                 | 1.98                          |
| 2/24/1997  |          |                          | 210.41                        | 25022.43                      | 42674.75667               | 70.55                 | 1.71                          |
| 4/1/1997   |          |                          | 636.11                        | 33669.23                      | 43159.84574               | 28.19                 | 1.28                          |
| 7/14/1997  |          |                          | 5715.19                       | 96686.74                      | 48947.46023               | -49.38                | 0.51                          |
| 8/12/1997  |          |                          | 9776.50                       | 68777.68                      | 53575.32152               | -22.10                | 0.78                          |
| 10/8/1997  |          |                          | 1027.56                       | 33390.56                      | 43605.90466               | 30.59                 | 1.31                          |
| 12/4/1997  |          |                          | 234.87                        | 23289.80                      | 42702.63535               | 83.35                 | 1.83                          |
| 2/5/2007   |          |                          | 308.27                        | 25197.83                      | 42786.2714                | 69.80                 | 1.70                          |
| 4/10/2007  |          |                          | 4146.94                       | 68535.07                      | 47160.43668               | -31.19                | 0.69                          |
| 5/24/2007  |          |                          | 53922.44                      | 164444.84                     | 103879.6162               | -36.83                | 0.63                          |
| 6/13/2007  |          |                          | 83190.77                      | 137084.90                     | 137230.884                | 0.11                  | 1.00                          |
| 7/16/2007  |          |                          | 4447.87                       | 52647.92                      | 47503.34447               | -9.77                 | 0.90                          |
| 8/14/2007  |          |                          | 2422.11                       | 37865.59                      | 45194.98956               | 19.36                 | 1.19                          |
| 10/17/2007 |          |                          | 609.20                        | 37414.81                      | 43129.17919               | 15.27                 | 1.15                          |
| 2/11/2008  |          |                          | 352.31                        | 30607.20                      | 42836.45303               | 39.96                 | 1.40                          |
| 4/8/2008   |          |                          | 239.76                        | 32690.62                      | 42708.21109               | 30.64                 | 1.31                          |
| 5/22/2008  |          |                          | 63366.20                      | 134158.92                     | 114640.7876               | -14.55                | 0.85                          |
| 6/18/2008  |          |                          | 19699.79                      | 103191.10                     | 64882.91513               | -37.12                | 0.63                          |
| 8/19/2008  |          |                          | 5959.85                       | 47251.66                      | 49226.24705               | 4.18                  | 1.04                          |
| 10/15/2008 |          |                          | 919.91                        | 36209.99                      | 43483.23846               | 20.09                 | 1.20                          |
| 12/4/2008  |          |                          | 1507.09                       | 16805.11                      | 44152.32684               | 162.73                | 2.63                          |
| 2/2/2009   |          |                          | 215.30                        | 26974.72                      | 42680.33241               | 58.22                 | 1.58                          |
| 4/7/2009   | 939.48   | 28797.52                 | 43505.54141                   | 51.07                         | 1.51                      |                       |                               |
| 5/28/2009  | 29564.37 | 126146.50                | 76123.5999                    | -39.65                        | 0.60                      |                       |                               |
| 6/16/2009  | 11012.02 | 51646.37                 | 54983.19498                   | 6.46                          | 1.06                      |                       |                               |
| 7/13/2009  | 7689.57  | 72128.21                 | 51197.2699                    | -29.02                        | 0.71                      |                       |                               |
| 8/11/2009  | 1282.00  | 27486.15                 | 43895.84296                   | 59.70                         | 1.60                      |                       |                               |
| 10/14/2009 | 1027.56  | 31784.14                 | 43605.90466                   | 37.19                         | 1.37                      |                       |                               |
| 12/3/2009  | 234.87   | 28325.43                 | 42702.63535                   | 50.76                         | 1.51                      |                       |                               |



CC-60 (continued)

| Date       | Scenario | Equation                 | TSS Load (kg/day)<br>observed | TDS Load (kg/day)<br>observed | TDS (kg/day)<br>estimated | Percent<br>Difference | Ratio<br>(estimated/observed) |
|------------|----------|--------------------------|-------------------------------|-------------------------------|---------------------------|-----------------------|-------------------------------|
| 2/3/2003   | S4-5     | TDS = 20.628*TSS + 18177 | 381.67                        | 17303.43                      | 26049.98886               | 50.55                 | 1.51                          |
| 4/1/2003   |          |                          | 1856.95                       | 57231.13                      | 56482.11888               | -1.31                 | 0.99                          |
| 12/4/2003  |          |                          | 2194.57                       | 19340.96                      | 63446.68595               | 228.04                | 3.28                          |
| 4/6/2004   |          |                          | 890.55                        | 51313.61                      | 36547.30734               | -28.78                | 0.71                          |
| 12/1/2004  |          |                          | 1027.56                       | 20653.96                      | 39373.50847               | 90.63                 | 1.91                          |
| 2/6/1995   |          |                          | 538.25                        | 12405.49                      | 29279.93301               | 136.02                | 2.36                          |
| 4/4/1995   |          |                          | 342.52                        | 17269.00                      | 25242.50282               | 46.17                 | 1.46                          |
| 10/11/1995 |          |                          | 415.92                        | 30374.43                      | 26756.53914               | -11.91                | 0.88                          |
| 12/7/1995  |          |                          | 748.65                        | 23491.42                      | 33620.17046               | 43.12                 | 1.43                          |
| 2/5/1996   |          |                          | 782.90                        | 23735.66                      | 34326.72074               | 44.62                 | 1.45                          |
| 4/2/1996   |          |                          | 1937.68                       | 38121.30                      | 58147.55883               | 52.53                 | 1.53                          |
| 10/9/1996  |          |                          | 406.13                        | 21169.98                      | 26554.66763               | 25.44                 | 1.25                          |
| 12/5/1996  |          |                          | 782.90                        | 21899.75                      | 34326.72074               | 56.74                 | 1.57                          |
| 2/24/1997  |          |                          | 210.41                        | 25022.43                      | 22517.23745               | -10.01                | 0.90                          |
| 4/1/1997   |          |                          | 636.11                        | 33669.23                      | 31298.6481                | -7.04                 | 0.93                          |
| 12/4/1997  |          |                          | 234.87                        | 23289.80                      | 23021.91622               | -1.15                 | 0.99                          |
| 2/5/2007   |          |                          | 308.27                        | 25197.83                      | 24535.95254               | -2.63                 | 0.97                          |
| 10/17/2007 |          |                          | 609.20                        | 37414.81                      | 30743.50145               | -17.83                | 0.82                          |
| 2/11/2008  |          |                          | 352.31                        | 30607.20                      | 25444.37433               | -16.87                | 0.83                          |
| 4/8/2008   |          |                          | 239.76                        | 32690.62                      | 23122.85198               | -29.27                | 0.71                          |
| 10/15/2008 |          |                          | 919.91                        | 36209.99                      | 37152.92187               | 2.60                  | 1.03                          |
| 12/4/2008  |          |                          | 1507.09                       | 16805.11                      | 49265.21243               | 193.16                | 2.93                          |
| 2/2/2009   |          |                          | 215.30                        | 26974.72                      | 22618.1732                | -16.15                | 0.84                          |
| 4/7/2009   |          |                          | 939.48                        | 28797.52                      | 37556.66489               | 30.42                 | 1.30                          |
| 10/14/2009 |          |                          | 1027.56                       | 31784.14                      | 39373.50847               | 23.88                 | 1.24                          |
| 12/3/2009  |          |                          | 234.87                        | 28325.43                      | 23021.91622               | -18.72                | 0.81                          |

CC-60 (continued)

| Date      | Scenario | Equation                 | TSS Load (kg/day)<br>observed | TDS Load (kg/day)<br>observed | TDS (kg/day)<br>estimated | Percent<br>Difference | Ratio<br>(estimated/observed) |
|-----------|----------|--------------------------|-------------------------------|-------------------------------|---------------------------|-----------------------|-------------------------------|
| 6/11/2003 | S4-11    | TDS = 0.9042*TSS + 58723 | 14985.25                      | 149167.47                     | 72272.66356               | -51.55                | 0.48                          |
| 10/8/2003 |          |                          | 626.32                        | 43222.50                      | 59289.32063               | 37.17                 | 1.37                          |
| 5/19/2004 |          |                          | 1071.60                       | 55283.76                      | 59691.93921               | 7.97                  | 1.08                          |
| 6/8/2004  |          |                          | 42413.76                      | 63292.90                      | 97073.52529               | 53.37                 | 1.53                          |
| 7/12/2004 |          |                          | 1526.66                       | 46369.77                      | 60103.40654               | 29.62                 | 1.30                          |
| 8/10/2004 |          |                          | 16184.07                      | 38313.09                      | 73356.63664               | 91.47                 | 1.91                          |
| 5/23/1996 |          |                          | 30337.49                      | 121956.70                     | 86154.15561               | -29.36                | 0.71                          |
| 7/15/1996 |          |                          | 6224.08                       | 70753.24                      | 64350.81128               | -9.05                 | 0.91                          |
| 7/14/1997 |          |                          | 5715.19                       | 96686.74                      | 63890.67577               | -33.92                | 0.66                          |
| 8/12/1997 |          |                          | 9776.50                       | 68777.68                      | 67562.91111               | -1.77                 | 0.98                          |
| 10/8/1997 |          |                          | 1027.56                       | 33390.56                      | 59652.11979               | 78.65                 | 1.79                          |
| 4/10/2007 |          |                          | 4146.94                       | 68535.07                      | 62472.662                 | -8.85                 | 0.91                          |
| 5/24/2007 |          |                          | 53922.44                      | 164444.84                     | 107479.6669               | -34.64                | 0.65                          |
| 6/13/2007 |          |                          | 83190.77                      | 137084.90                     | 133944.0955               | -2.29                 | 0.98                          |
| 7/16/2007 |          |                          | 4447.87                       | 52647.92                      | 62744.76136               | 19.18                 | 1.19                          |
| 8/14/2007 |          |                          | 2422.11                       | 37865.59                      | 60913.06807               | 60.87                 | 1.61                          |
| 5/22/2008 |          |                          | 63366.20                      | 134158.92                     | 116018.7202               | -13.52                | 0.86                          |
| 6/18/2008 |          |                          | 19699.79                      | 103191.10                     | 76535.55363               | -25.83                | 0.74                          |
| 8/19/2008 |          |                          | 5959.85                       | 47251.66                      | 64111.89476               | 35.68                 | 1.36                          |
| 5/28/2009 |          |                          | 29564.37                      | 126146.50                     | 85455.10358               | -32.26                | 0.68                          |
| 6/16/2009 |          |                          | 11012.02                      | 51646.37                      | 68680.06705               | 32.98                 | 1.33                          |
| 7/13/2009 |          |                          | 7689.57                       | 72128.21                      | 65675.91307               | -8.95                 | 0.91                          |
| 8/11/2009 |          |                          | 1282.00                       | 27486.15                      | 59882.18754               | 117.86                | 2.18                          |
